# Supplementary material
Source: PubMed Central journal article supplement (PMC3774022)
Supplement: NIHMS493797-supplement-supplement_1.pdf [file NIHMS493797-supplement-supplement_1.pdf]

**Supplemental Table. Baseline characteristics of participants in the JUPITER trial among those with none or at least one major risk factor for diabetes (metabolic syndrome, impaired fasting glucose, HbA1c > 6 percent, or body mass index  $\geq$  30 kg/m<sup>2</sup>); by treatment group.**

| Baseline<br>Characteristic         | Major Risk Factors for Diabetes |                          |                       |                                 |
|------------------------------------|---------------------------------|--------------------------|-----------------------|---------------------------------|
|                                    | Rosuvastatin; N=3 065           | None<br>Placebo; N=3 030 | Rosuvastatin; N=5 743 | One or More<br>Placebo; N=5 765 |
| Age, years                         | 66 (60-72)                      | 66 (60-72)               | 66 (61-71)            | 66 (60-71)                      |
| Female, N (%)                      | 1 003 (32.7)                    | 960 (31.7)               | 2 394 (41.7)          | 2 377 (41.2)                    |
| Race/Ethnicity, N (%)              |                                 |                          |                       |                                 |
| Caucasian                          | 2 298 (75.0)                    | 2 246 (74.1)             | 3 997 (69.6)          | 4 013 (69.6)                    |
| Black                              | 386 (12.6)                      | 386 (12.7)               | 708 (12.3)            | 731 (12.7)                      |
| Hispanic                           | 265 (8.6)                       | 284 (9.4)                | 836 (14.6)            | 827 (14.3)                      |
| Other/unknown                      | 116 (3.8)                       | 114 (3.8)                | 202 (3.5)             | 194 (3.4)                       |
| Body Mass Index, kg/m <sup>2</sup> | 25.4 (23.1-27.5)                | 25.5 (23.2-27.5)         | 30.8 (27.5-34.1)      | 30.7 (27.5-33.8)                |
| Hypertension, N (%)                | 1 408 (45.9)                    | 1 349 (44.5)             | 3 613 (62.9)          | 3 725 (64.6)                    |
| Current Smoking, N (%)             | 651 (21.2)                      | 667 (22.0)               | 737 (12.8)            | 738 (12.8)                      |
| hsCRP, mg/L                        |                                 |                          |                       |                                 |
| men                                | 3.8 (2.6-6.6)                   | 3.9 (2.6-6.8)            | 4.1 (2.8-6.6)         | 4.2 (2.8-6.8)                   |
| women                              | 3.8 (2.7-6.0)                   | 3.8 (2.6-6.4)            | 5.0 (3.3-8.3)         | 5.0 (3.3-8.2)                   |
| LDL-C, mg/dL                       | 108 (93-119)                    | 108 (92-118)             | 108 (95-119)          | 109 (95-119)                    |
| HDL-C, mg/dL                       | 54 (45-66)                      | 54 (46-66)               | 46 (38-56)            | 46 (38-56)                      |
| Triglycerides, mg/dL               | 97 (73-127)                     | 97 (74-128)              | 135 (96-193)          | 134 (96-192)                    |
| Total Cholesterol, mg/dL           | 185 (167-199)                   | 184 (167-198)            | 186 (169-200)         | 186 (170-200)                   |
| Apo A, mg/dL                       | 171 (151-194)                   | 169 (150-192)            | 158 (141-179)         | 158 (141-179)                   |
| Apo B, mg/dL                       | 104 (91-117)                    | 104 (91-116)             | 112 (98-125)          | 112 (99-125)                    |
| Glucose, mg/dL                     | 89 (84-94)                      | 89 (84-94)               | 99 (90-105)           | 99 (91-106)                     |
| HbA1c, %                           | 5.6 (5.3-5.7)                   | 5.6 (5.4-5.7)            | 5.8 (5.5-6.1)         | 5.8 (5.5-6.1)                   |

All values are median (interquartile range) or N (%). For hsCRP, values are based on the average of the screening and randomization visits
